# Supplementary material for: Impairment of the Bacterial Biofilm Stability by Triclosan
Source: PLoS One. 2012 Apr 16;7(4):e31183. doi: 10.1371/journal.pone.0031183 (PMC3327702; doi:10.1371/journal.pone.0031183)
Supplement: Table S1 — Partial 16S rRNA gene sequences obtained from DGGE bands. The sequences (27 partial 16S rRNA gene sequences in total, read length 550 nucleotides) recovered from DGGE bands were categorized as: (group 1) those excised only from the control biofilm with no TCS exposure; (group 2) those that appeared in all DGGE patterns independent of TCS concentrations (representative bands cut out from T1 and T2); (group 3) those that only were present at the lowest triclosan concentration (bands unique to sample T1); and (group 4) those that only appeared at the highest triclosan concentration (bands unique to sample T5). (XLS) [file pone.0031183.s001.xls]

## Sheet: Sheet1
No.	Treatment	Clone	Next Cultured Representative	Accession No.	Similarity [%]	NCBI Taxonomy	Comments
Group 1 - Controll biofilm no triclosan
1	CB	2c1	Proteiniphilum acetatigenes	AY742226	92	Bacteroidetes/Chlorobi group; Bacteroidetes; Bacteroidia; Bacteroidales; Porphyromonadaceae; Proteiniphilum	occuring only in the control biofilm without triclosan and at T1, highly sensitive to higher triclosan conc.
2	CB	2c2	Tissierella creatinophila	X80227	93-95	Firmicutes; Clostridia; Clostridiales; Clostridiales incertae sedis; Clostridiales Family XI. Incertae Sedis; Tissierella	Bacteroidetes/Chlorobi - Bacteroidales (Proteiniphilum)
3	CB	2c3	Proteiniphilum acetatigenes	AY742226	92	Bacteroidetes/Chlorobi group; Bacteroidetes; Bacteroidia; Bacteroidales; Porphyromonadaceae; Proteiniphilum
4	CB	2c4	Acidovorax delafieldii	AF316144	97	Proteobacteria; Betaproteobacteria; Burkholderiales; Comamonadaceae; Acidovorax
Group 2 - Always present - Tolerant to low and high triclosan conc.
5	T1	2c1	Staphylococcus sciuri subsp. R	AB233332	90	Firmicutes; Bacilli; Bacillales; Staphylococcaceae; Staphylococcus	Tolerant to low and high triclosan conc. - always present
6	T1	2c2	Alcaligenes faecalis	M22508	99	Proteobacteria; Betaproteobacteria; Burkholderiales; Alcaligenaceae; Alcaligenes	Betaproeteobacteria - Burkholderiales (Alcaligenes)
7	T1	2c3	Alcaligenis faecales	M22508	99	Proteobacteria; Betaproteobacteria; Burkholderiales; Alcaligenaceae; Alcaligenes
8	T1	2c4	Pseudoalteromonas issachenkonii	AF316144	99	Proteobacteria; Gammaproteobacteria; Alteromonadales; Pseudoalteromonadaceae; Pseudoalteromonas
9	T1	2c5	Tissierella creatinophila	X80227	93-95	Firmicutes; Clostridia; Clostridiales; Clostridiales incertae sedis; Clostridiales Family XI. Incertae Sedis; Tissierella
10	T2	2c1	Fusibacter paucivorans	AF050099	94	Firmicutes; Clostridia; Clostridiales; Clostridiales incertae sedis; Clostridiales Family XII. Incertae Sedis; Fusibacter
11	T2	2c2	Alcaligenis faecales	M22508	99	Proteobacteria; Betaproteobacteria; Burkholderiales; Alcaligenaceae; Alcaligenes
Group 3 - Only at low triclosan conc.
12	T1	2a1	Salegentibacter mishustinae	AY576653	95	Bacteroidetes/Chlorobi group; Bacteroidetes; Flavobacteria; Flavobacteriales; Flavobacteriaceae; Salegentibacter	Most sensitive
13	T1	2a2	Brumimicrobium glaciale	AF521195	96	Bacteroidetes/Chlorobi group; Bacteroidetes; Flavobacteria; Flavobacteriales; Cryomorphaceae; Brumimicrobium	Bacteriodetes - Flavobacteriales
14	T1	2a3	Proteiniphilum acetatigenes	AY742226	92	Bacteroidetes/Chlorobi group; Bacteroidetes; Bacteroidia; Bacteroidales; Porphyromonadaceae; Proteiniphilum
15	T1	2a4	Tissierella creatinophila	X80227	93-95	Firmicutes; Clostridia; Clostridiales; Clostridiales incertae sedis; Clostridiales Family XI. Incertae Sedis; Tissierella
16	T1	2b1	Brumimicrobium glaciale	AF521195	96	Bacteroidetes/Chlorobi group; Bacteroidetes; Flavobacteria; Flavobacteriales; Cryomorphaceae; Brumimicrobium
17	T1	2b3	Brumimicrobium glaciale	AF521195	96	Bacteroidetes/Chlorobi group; Bacteroidetes; Flavobacteria; Flavobacteriales; Cryomorphaceae; Brumimicrobium
Group 4 - Only at high triclosan conc.
18	T5	5b1	Carnobacterium mobile	AB083414	98-99	Firmicutes; Bacilli; Lactobacillales; Carnobacteriaceae; Carnobacterium	Tolerant to triclosan/selective advantage at high triclosan conc.
19	T5	5b2	Carnobacterium mobile	AB083414	98-99	Firmicutes; Bacilli; Lactobacillales; Carnobacteriaceae; Carnobacterium	Firmicutes - Lactobacillales & Clostridiales (Lutispora)
20	T5	5b3	Pseudochrobactrum glaciei	AB369864	98-99	Proteobacteria; Alphaproteobacteria; Rhizobiales; Brucellaceae; Pseudochrobactrum	Alphaproteobacteria - Rhizobiales - Brucellaceae
21	T5	5b4	Pseudochrobactrum glaciei	AB369864	98-99	Proteobacteria; Alphaproteobacteria; Rhizobiales; Brucellaceae; Pseudochrobactrum
22	T5	5b5	Pseudochrobactrum glaciei	AB369864	98-99	Proteobacteria; Alphaproteobacteria; Rhizobiales; Brucellaceae; Pseudochrobactrum
23	T5	6b1	Pseudochrobactrum glaciei	AB369864	98-99	Proteobacteria; Alphaproteobacteria; Rhizobiales; Brucellaceae; Pseudochrobactrum
24	T5	6b2	Carnobacterium inhibens	Z73313	99-100	Firmicutes; Bacilli; Lactobacillales; Carnobacteriaceae; Carnobacterium
25	T5	6b3	Lutispora thermophila	AB186360	95	Firmicutes; Clostridia; Clostridiales; Clostridiaceae; Lutispora
26	T5	6b4	Pseudochrobactrum glaciei	AB369864	98-99	Proteobacteria; Alphaproteobacteria; Rhizobiales; Brucellaceae; Pseudochrobactrum
27	T5	6b5	Carnobacterium inhibens	Z73313	99-100	Firmicutes; Bacilli; Lactobacillales; Carnobacteriaceae; Carnobacterium
